# Supplementary material for: Primary Reasons for Osteopathic Consultation: A Prospective Survey in Quebec
Source: PubMed Central journal article supplement (PMC4153609; doi:10.1371/journal.pone.0106259), 2014-09-03
Supplement: pone.0106259.s001.pdf [file pone.0106259.s001.pdf]

## SONDAGE SUR LES MOTIFS DE CONSULTATION

|                                                     |  |                                  |  |                                       |  |                                   |  |                                                                      |  |                                   |  |
|-----------------------------------------------------|--|----------------------------------|--|---------------------------------------|--|-----------------------------------|--|----------------------------------------------------------------------|--|-----------------------------------|--|
| <b>Région de pratique :</b>                         |  |                                  |  |                                       |  |                                   |  | <b>Genre :</b> F <input type="checkbox"/> H <input type="checkbox"/> |  |                                   |  |
| <b>Type de pratique :</b>                           |  | Général <input type="checkbox"/> |  | Périnatalité <input type="checkbox"/> |  | Sportif <input type="checkbox"/>  |  | Uro-génital <input type="checkbox"/>                                 |  |                                   |  |
| <b>Exp. comme ostéo diplômé(e) :</b>                |  | 0-3 ans <input type="checkbox"/> |  | 3-5 ans <input type="checkbox"/>      |  | 5-10 ans <input type="checkbox"/> |  | 10-15 ans <input type="checkbox"/>                                   |  | 15 ans + <input type="checkbox"/> |  |
| <b>Temps par séance :</b>                           |  |                                  |  |                                       |  | <b>% de pratique ostéopathe :</b> |  |                                                                      |  |                                   |  |
| <b>Nombre total de clients pendant le sondage :</b> |  |                                  |  | <b># H :</b>                          |  | <b># F :</b>                      |  | <b># enfants (0-14 ans) :</b>                                        |  |                                   |  |

| <b>PROBLÈMES MUSCULO-SQUELETTIQUES</b>                                                                 |          |   |   |                            |   |   |   |                            |   |   |                                        |  |
|--------------------------------------------------------------------------------------------------------|----------|---|---|----------------------------|---|---|---|----------------------------|---|---|----------------------------------------|--|
| <b>Douleurs du membre supérieur</b>                                                                    |          |   |   |                            |   |   |   |                            |   |   | <b>Si 10+, indiquez le # exact ↓ :</b> |  |
| Épaule                                                                                                 | <b>F</b> | 1 | 2 | 3                          | 4 | 5 | 6 | 7                          | 8 | 9 | 10                                     |  |
|                                                                                                        | <b>H</b> | 1 | 2 | 3                          | 4 | 5 | 6 | 7                          | 8 | 9 | 10                                     |  |
| Coude                                                                                                  | <b>F</b> | 1 | 2 | 3                          | 4 | 5 | 6 | 7                          | 8 | 9 | 10                                     |  |
|                                                                                                        | <b>H</b> | 1 | 2 | 3                          | 4 | 5 | 6 | 7                          | 8 | 9 | 10                                     |  |
| Poignet et main                                                                                        | <b>F</b> | 1 | 2 | 3                          | 4 | 5 | 6 | 7                          | 8 | 9 | 10                                     |  |
|                                                                                                        | <b>H</b> | 1 | 2 | 3                          | 4 | 5 | 6 | 7                          | 8 | 9 | 10                                     |  |
| Tout le membre supérieur                                                                               | <b>F</b> | 1 | 2 | 3                          | 4 | 5 | 6 | 7                          | 8 | 9 | 10                                     |  |
|                                                                                                        | <b>H</b> | 1 | 2 | 3                          | 4 | 5 | 6 | 7                          | 8 | 9 | 10                                     |  |
| Douleurs référées au membre supérieur                                                                  | <b>F</b> | 1 | 2 | 3                          | 4 | 5 | 6 | 7                          | 8 | 9 | 10                                     |  |
|                                                                                                        | <b>H</b> | 1 | 2 | 3                          | 4 | 5 | 6 | 7                          | 8 | 9 | 10                                     |  |
| <b>Douleurs du membre inférieur</b>                                                                    |          |   |   |                            |   |   |   |                            |   |   | <b>Si 10+, indiquez le # exact ↓ :</b> |  |
| Hanche                                                                                                 | <b>F</b> | 1 | 2 | 3                          | 4 | 5 | 6 | 7                          | 8 | 9 | 10                                     |  |
|                                                                                                        | <b>H</b> | 1 | 2 | 3                          | 4 | 5 | 6 | 7                          | 8 | 9 | 10                                     |  |
| Genou                                                                                                  | <b>F</b> | 1 | 2 | 3                          | 4 | 5 | 6 | 7                          | 8 | 9 | 10                                     |  |
|                                                                                                        | <b>H</b> | 1 | 2 | 3                          | 4 | 5 | 6 | 7                          | 8 | 9 | 10                                     |  |
| Cheville et pied                                                                                       | <b>F</b> | 1 | 2 | 3                          | 4 | 5 | 6 | 7                          | 8 | 9 | 10                                     |  |
|                                                                                                        | <b>H</b> | 1 | 2 | 3                          | 4 | 5 | 6 | 7                          | 8 | 9 | 10                                     |  |
| Tout le membre inférieur                                                                               | <b>F</b> | 1 | 2 | 3                          | 4 | 5 | 6 | 7                          | 8 | 9 | 10                                     |  |
|                                                                                                        | <b>H</b> | 1 | 2 | 3                          | 4 | 5 | 6 | 7                          | 8 | 9 | 10                                     |  |
| Douleurs référées au membre inférieur                                                                  | <b>F</b> | 1 | 2 | 3                          | 4 | 5 | 6 | 7                          | 8 | 9 | 10                                     |  |
|                                                                                                        | <b>H</b> | 1 | 2 | 3                          | 4 | 5 | 6 | 7                          | 8 | 9 | 10                                     |  |
| <b>Douleurs vertébrales et du bassin</b>                                                               |          |   |   |                            |   |   |   |                            |   |   | <b>Si 10+, indiquez le # exact ↓ :</b> |  |
| Douleurs cervicales                                                                                    | <b>F</b> | 1 | 2 | 3                          | 4 | 5 | 6 | 7                          | 8 | 9 | 10                                     |  |
|                                                                                                        | <b>H</b> | 1 | 2 | 3                          | 4 | 5 | 6 | 7                          | 8 | 9 | 10                                     |  |
| Douleurs dorsales et costales                                                                          | <b>F</b> | 1 | 2 | 3                          | 4 | 5 | 6 | 7                          | 8 | 9 | 10                                     |  |
|                                                                                                        | <b>H</b> | 1 | 2 | 3                          | 4 | 5 | 6 | 7                          | 8 | 9 | 10                                     |  |
| Douleurs lombaires et lombo-sacrées                                                                    | <b>F</b> | 1 | 2 | 3                          | 4 | 5 | 6 | 7                          | 8 | 9 | 10                                     |  |
|                                                                                                        | <b>H</b> | 1 | 2 | 3                          | 4 | 5 | 6 | 7                          | 8 | 9 | 10                                     |  |
| Douleur bassin (sacro-iliaque et coccyx)                                                               | <b>F</b> | 1 | 2 | 3                          | 4 | 5 | 6 | 7                          | 8 | 9 | 10                                     |  |
|                                                                                                        | <b>H</b> | 1 | 2 | 3                          | 4 | 5 | 6 | 7                          | 8 | 9 | 10                                     |  |
| Douleurs vertébrales étendues (non-spécifiques)                                                        | <b>F</b> | 1 | 2 | 3                          | 4 | 5 | 6 | 7                          | 8 | 9 | 10                                     |  |
|                                                                                                        | <b>H</b> | 1 | 2 | 3                          | 4 | 5 | 6 | 7                          | 8 | 9 | 10                                     |  |
| <b>Autres problèmes musculo-squelettiques</b> (indiquez le motif de consultation et le genre du sujet) |          |   |   |                            |   |   |   |                            |   |   |                                        |  |
| F <input type="checkbox"/>                                                                             |          |   |   | F <input type="checkbox"/> |   |   |   | F <input type="checkbox"/> |   |   |                                        |  |
| H <input type="checkbox"/>                                                                             |          |   |   | H <input type="checkbox"/> |   |   |   | H <input type="checkbox"/> |   |   |                                        |  |

| <b>DOULEURS OU DYSFONCTIONNEMENTS VISCÉRAUX</b>                                                                 |          |   |   |                            |   |   |   |                            |   |   | <b>Si 10+, indiquez le # exact ↓ :</b> |  |
|-----------------------------------------------------------------------------------------------------------------|----------|---|---|----------------------------|---|---|---|----------------------------|---|---|----------------------------------------|--|
| Troubles digestifs                                                                                              | <b>F</b> | 1 | 2 | 3                          | 4 | 5 | 6 | 7                          | 8 | 9 | 10                                     |  |
|                                                                                                                 | <b>H</b> | 1 | 2 | 3                          | 4 | 5 | 6 | 7                          | 8 | 9 | 10                                     |  |
| Troubles pulmonaires et de la respiration                                                                       | <b>F</b> | 1 | 2 | 3                          | 4 | 5 | 6 | 7                          | 8 | 9 | 10                                     |  |
|                                                                                                                 | <b>H</b> | 1 | 2 | 3                          | 4 | 5 | 6 | 7                          | 8 | 9 | 10                                     |  |
| Troubles gynécologiques                                                                                         | <b>F</b> | 1 | 2 | 3                          | 4 | 5 | 6 | 7                          | 8 | 9 | 10                                     |  |
|                                                                                                                 | <b>H</b> | 1 | 2 | 3                          | 4 | 5 | 6 | 7                          | 8 | 9 | 10                                     |  |
| <b>Autres douleurs ou dysfonctionnements viscéraux</b> (indiquez le motif de consultation et le genre du sujet) |          |   |   |                            |   |   |   |                            |   |   |                                        |  |
| F <input type="checkbox"/>                                                                                      |          |   |   | F <input type="checkbox"/> |   |   |   | F <input type="checkbox"/> |   |   |                                        |  |
| H <input type="checkbox"/>                                                                                      |          |   |   | H <input type="checkbox"/> |   |   |   | H <input type="checkbox"/> |   |   |                                        |  |

| DOULEURS OU DYSFONCTIONNEMENTS DE LA TÊTE                                                                        |   |   |   |                            |   |   |   |                            |   | Si 10+, indiquez le # exact ↓ : |    |  |
|------------------------------------------------------------------------------------------------------------------|---|---|---|----------------------------|---|---|---|----------------------------|---|---------------------------------|----|--|
| Migraines                                                                                                        | F | 1 | 2 | 3                          | 4 | 5 | 6 | 7                          | 8 | 9                               | 10 |  |
|                                                                                                                  | H | 1 | 2 | 3                          | 4 | 5 | 6 | 7                          | 8 | 9                               | 10 |  |
| Céphalées/maux de tête                                                                                           | F | 1 | 2 | 3                          | 4 | 5 | 6 | 7                          | 8 | 9                               | 10 |  |
|                                                                                                                  | H | 1 | 2 | 3                          | 4 | 5 | 6 | 7                          | 8 | 9                               | 10 |  |
| Étourdissements et/ou vertiges                                                                                   | F | 1 | 2 | 3                          | 4 | 5 | 6 | 7                          | 8 | 9                               | 10 |  |
|                                                                                                                  | H | 1 | 2 | 3                          | 4 | 5 | 6 | 7                          | 8 | 9                               | 10 |  |
| Douleurs du visage                                                                                               | F | 1 | 2 | 3                          | 4 | 5 | 6 | 7                          | 8 | 9                               | 10 |  |
|                                                                                                                  | H | 1 | 2 | 3                          | 4 | 5 | 6 | 7                          | 8 | 9                               | 10 |  |
| Troubles de la sphère ORL adulte                                                                                 | F | 1 | 2 | 3                          | 4 | 5 | 6 | 7                          | 8 | 9                               | 10 |  |
|                                                                                                                  | H | 1 | 2 | 3                          | 4 | 5 | 6 | 7                          | 8 | 9                               | 10 |  |
| Accompagnement à l'orthodontie                                                                                   | F | 1 | 2 | 3                          | 4 | 5 | 6 | 7                          | 8 | 9                               | 10 |  |
|                                                                                                                  | H | 1 | 2 | 3                          | 4 | 5 | 6 | 7                          | 8 | 9                               | 10 |  |
| Problèmes de l'ATM                                                                                               | F | 1 | 2 | 3                          | 4 | 5 | 6 | 7                          | 8 | 9                               | 10 |  |
|                                                                                                                  | H | 1 | 2 | 3                          | 4 | 5 | 6 | 7                          | 8 | 9                               | 10 |  |
| <b>Autres douleurs ou dysfonctionnements de la tête</b> (indiquez le motif de consultation et le genre du sujet) |   |   |   |                            |   |   |   |                            |   |                                 |    |  |
| F <input type="checkbox"/>                                                                                       |   |   |   | F <input type="checkbox"/> |   |   |   | F <input type="checkbox"/> |   |                                 |    |  |
| H <input type="checkbox"/>                                                                                       |   |   |   | H <input type="checkbox"/> |   |   |   | H <input type="checkbox"/> |   |                                 |    |  |

| PÉRINATALITÉ                                                                                 |   |   |   |   |   |   |   |   |   |                                 |  |  |
|----------------------------------------------------------------------------------------------|---|---|---|---|---|---|---|---|---|---------------------------------|--|--|
| <b>Femmes enceintes</b>                                                                      |   |   |   |   |   |   |   |   |   | Si 10+, indiquez le # exact ↓ : |  |  |
| Suivi de grossesse (tous motifs confondus)                                                   | 1 | 2 | 3 | 4 | 5 | 6 | 7 | 8 | 9 | 10                              |  |  |
| <b>Bébés et enfants (0 à 14 ans)</b>                                                         |   |   |   |   |   |   |   |   |   | Si 10+, indiquez le # exact ↓ : |  |  |
| Contrôle suite à la naissance                                                                | 1 | 2 | 3 | 4 | 5 | 6 | 7 | 8 | 9 | 10                              |  |  |
| Torticolis                                                                                   | 1 | 2 | 3 | 4 | 5 | 6 | 7 | 8 | 9 | 10                              |  |  |
| Déformations du crâne (ex. plagiocéphalie)                                                   | 1 | 2 | 3 | 4 | 5 | 6 | 7 | 8 | 9 | 10                              |  |  |
| Otites/sinusite/sphère ORL                                                                   | 1 | 2 | 3 | 4 | 5 | 6 | 7 | 8 | 9 | 10                              |  |  |
| Reflux et régurgitations                                                                     | 1 | 2 | 3 | 4 | 5 | 6 | 7 | 8 | 9 | 10                              |  |  |
| Troubles du dév. moteur                                                                      | 1 | 2 | 3 | 4 | 5 | 6 | 7 | 8 | 9 | 10                              |  |  |
| Trouble du dév. psycho-cognitif                                                              | 1 | 2 | 3 | 4 | 5 | 6 | 7 | 8 | 9 | 10                              |  |  |
| Troubles pulmonaires/respiration                                                             | 1 | 2 | 3 | 4 | 5 | 6 | 7 | 8 | 9 | 10                              |  |  |
| <b>Autres motifs concernant les bébés et les enfants</b> (indiquez le motif de consultation) |   |   |   |   |   |   |   |   |   |                                 |  |  |
|                                                                                              |   |   |   |   |   |   |   |   |   |                                 |  |  |
|                                                                                              |   |   |   |   |   |   |   |   |   |                                 |  |  |

| TROUBLES GÉNÉRAUX                                                                        |   |   |   |                            |   |   |   |                            |   | Si 10+, indiquez le # exact ↓ : |    |  |
|------------------------------------------------------------------------------------------|---|---|---|----------------------------|---|---|---|----------------------------|---|---------------------------------|----|--|
| Fatigue                                                                                  | F | 1 | 2 | 3                          | 4 | 5 | 6 | 7                          | 8 | 9                               | 10 |  |
|                                                                                          | H | 1 | 2 | 3                          | 4 | 5 | 6 | 7                          | 8 | 9                               | 10 |  |
| Humeur                                                                                   | F | 1 | 2 | 3                          | 4 | 5 | 6 | 7                          | 8 | 9                               | 10 |  |
|                                                                                          | H | 1 | 2 | 3                          | 4 | 5 | 6 | 7                          | 8 | 9                               | 10 |  |
| Sommeil                                                                                  | F | 1 | 2 | 3                          | 4 | 5 | 6 | 7                          | 8 | 9                               | 10 |  |
|                                                                                          | H | 1 | 2 | 3                          | 4 | 5 | 6 | 7                          | 8 | 9                               | 10 |  |
| Douleurs chroniques et systémiques                                                       | F | 1 | 2 | 3                          | 4 | 5 | 6 | 7                          | 8 | 9                               | 10 |  |
|                                                                                          | H | 1 | 2 | 3                          | 4 | 5 | 6 | 7                          | 8 | 9                               | 10 |  |
| <b>Autres troubles généraux</b> (indiquez le motif de consultation et le genre du sujet) |   |   |   |                            |   |   |   |                            |   |                                 |    |  |
| F <input type="checkbox"/>                                                               |   |   |   | F <input type="checkbox"/> |   |   |   | F <input type="checkbox"/> |   |                                 |    |  |
| H <input type="checkbox"/>                                                               |   |   |   | H <input type="checkbox"/> |   |   |   | H <input type="checkbox"/> |   |                                 |    |  |

| AUTRES MOTIFS DE CONSULTATION NON ENCORE CITÉS (indiquez le motif de consultation et le genre du sujet) |  |  |  |                            |  |  |  |                            |  |  |  |  |
|---------------------------------------------------------------------------------------------------------|--|--|--|----------------------------|--|--|--|----------------------------|--|--|--|--|
| F <input type="checkbox"/>                                                                              |  |  |  | F <input type="checkbox"/> |  |  |  | F <input type="checkbox"/> |  |  |  |  |
| H <input type="checkbox"/>                                                                              |  |  |  | H <input type="checkbox"/> |  |  |  | H <input type="checkbox"/> |  |  |  |  |
| F <input type="checkbox"/>                                                                              |  |  |  | F <input type="checkbox"/> |  |  |  | F <input type="checkbox"/> |  |  |  |  |
| H <input type="checkbox"/>                                                                              |  |  |  | H <input type="checkbox"/> |  |  |  | H <input type="checkbox"/> |  |  |  |  |
